# Supplementary material
Source: Elsevier journal article supplement (https://www.sciencedirect.com/science/article/pii/S0870255122000300)
Supplement: mmc1 [file S0870255122000300:mmc1.pdf]

Supplementary Table 1 - Baseline Characteristics of the Patients

| Patient Characteristics*                                                                | N = 64              |
|-----------------------------------------------------------------------------------------|---------------------|
| Age - yr.                                                                               | 68±9                |
| Male sex - no. (%)                                                                      | 61 (95.3)           |
| <b>Coronary heart disease</b>                                                           |                     |
| Time since last myocardial infarction – yr. **                                          | 10.8 ± 9.0          |
| Left main disease - no. (%)                                                             | 7 (10.6)            |
| Multivessel disease - no. (%)                                                           | 38 (59.4)           |
| Number of diseased vessels                                                              | 2±0.8               |
| Previous percutaneous revascularization - no. (%)                                       | 39 (60.9)           |
| Previous surgical revascularization - no. (%)                                           | 14 (21.9)           |
| <b>Heart failure and comorbidities</b>                                                  |                     |
| NYHA functional class                                                                   |                     |
| I/II - no. (%)                                                                          | 20 (31.3)/33 (51.6) |
| III - no. (%)                                                                           | 11 (17.2)           |
| LV ejection fraction - no. (%)                                                          | 33 ±11              |
| Previous stroke - no. (%)                                                               | 7 (10.9)            |
| Peripheral artery disease - no. (%)                                                     | 7 (10.9)            |
| Atrial fibrillation or flutter - no. (%)                                                | 23 (35.9)           |
| Hypertension - no. (%)                                                                  | 57 (89.2)           |
| Diabetes - no. (%)                                                                      | 19 (29.7)           |
| Active smoking - no. (%)                                                                | 18 (28.1)           |
| Obesity - no. (%)                                                                       | 14 (21.9)           |
| Renal failure*** - no. (%)                                                              | 34 (53.1)           |
| Estimated GFR†                                                                          | 58.8 ±25.6          |
| Chronic pulmonary obstructive disease - no. (%)                                         | 10 (15.6)           |
| <b>Cardiovascular medication</b>                                                        |                     |
| Antiarrhythmic drug - no. (%)                                                           | 50 (78.1)           |
| Amiodarone - no. (%)                                                                    | 45 (70.3)           |
| Sotalol - no. (%)                                                                       | 5 (7.8)             |
| Beta-blocker                                                                            | 57 (89.1)           |
| Renin-Angiotensin blocker # - no. (%)                                                   | 53 (82.8)           |
| Neprisylin inhibitor - no. (%)                                                          | 10 (15.6)           |
| Mineralocorticoid receptor blocker - no. (%)                                            | 37 (57.8)           |
| Selective sinus-node inhibitor (Ivabradine) - no. (%)                                   | 3 (4.8)             |
| Antiplatelet therapy - no. (%)                                                          | 46 (71.9)           |
| Anticoagulant therapy - no. (%)                                                         | 25 (39.1)           |
| Diuretic - no. (%)                                                                      | 43 (67.2)           |
| Nitrate - no. (%)                                                                       | 13 (20.3)           |
| Calcium channel blocker - no. (%)                                                       | 6 (9.4)             |
| Statins - no. (%)                                                                       | 60 (93.8)           |
| <b>Previous type of ICD device</b>                                                      |                     |
| Indication and type of ICD before the index procedure - no. (%)                         | 53 (82.8)           |
| Primary prevention - no. (%)                                                            | 19 (29.7)           |
| Secondary prevention - no. (%)                                                          | 34 (53.1)           |
| Single-chamber - no. (%)                                                                | 25 (39.1)           |
| Single-chamber DX - no. (%)                                                             | 3 (4.7)             |
| Dual- chamber - no. (%)                                                                 | 16 (25.0)           |
| CRT defibrillator - no. (%)                                                             | 9 (14.1)            |
| ICD implanted after index procedure - no. (%)                                           | 11 (17.2)           |
| <b>Previous VT ablation (using non using high density mapping technology) - no. (%)</b> | <b>8 (12.5)</b>     |
| <b>Indication for ablation</b>                                                          |                     |
| Sustained VT requiring external cardioversion - no. (%)                                 | 20 (31.3)           |
| Appropriate ICD shock - no. (%)                                                         | 44 (68.8)           |
| VT storm - no. (%)                                                                      | 25 (39.1)           |
| <b>PAINESD score</b>                                                                    |                     |
| Low-risk - no. (%)                                                                      | 5 (7.8)             |
| Intermediate-risk - no. (%)                                                             | 39 (60.9)           |
| High-risk - no. (%)                                                                     | 20 (31.3)           |

\* Plus-minus values are means ±SD.

\*\* The data are from 59 patients. The remaining 5 patients had no history of previous myocardial infarction and diagnosis of IHD was based on data from cardiovascular imaging.

\*\*\* Estimated glomerular filtration rate ≤ 60 ml/m2.

† The estimated glomerular filtration rate (GFR) was calculated with the use of the Cockcroft-Gault formula.

# Angiotensin-converting-enzyme inhibitor or angiotensin receptor blocker

CRT: cardiac resynchronization therapy; DX, single-lead ICD capable of atrial sensing via floating dipole; ICD: Implantable cardioverter defibrillator LV: Left ventricle; NYHA: New York Heart Association;

VT: Ventricular tachycardia
