# Supplementary material
Source: Elsevier journal article supplement (https://www.sciencedirect.com/science/article/pii/S0870255122000300)
Supplement: mmc2 [file S0870255122000300:mmc2.pdf]

Supplementary Table 2 - Radiofrequency catheter ablation procedural data and outcomes

| Procedural Characteristics *                                                             | N = 64              |
|------------------------------------------------------------------------------------------|---------------------|
| 3D electroanatomic mapping system and multielectrode mapping catheter - no. (%)          | 64 (100)            |
| Carto 3 and Pentarray- no. (%)                                                           | 50 (78.1)           |
| Ensite Precision and HD grid - no. (%)                                                   | 8 (12.5)            |
| Rhythmia and Intellamap Orion - no. (%)                                                  | 6 (9.4)             |
| Real-time image integration - no. (%)                                                    | 11 (17.2)           |
| MDCT- no. (%)                                                                            | 6 (9.4)             |
| MRI - no. (%)                                                                            | 6 (9.4)             |
| LV endocardial access - no. (%)                                                          | 64 (100)            |
| Anterograde transseptal - no. (%)                                                        | 34 (53.1)           |
| Retrograde aortic - no. (%)                                                              | 12 (18.8)           |
| Combined - no. (%)                                                                       | 18 (28.1)           |
| LV epicardial access- no. (%)                                                            | 1 (1.6)             |
| Substrate Mapping **                                                                     |                     |
| Sinus rhythm or atrial pacing/Right ventricle pacing - no. (%)                           | 31 (48.4)/33 (51.6) |
| Number of points – median [IQR]                                                          | 2556 [1495]         |
| Scar location                                                                            |                     |
| Left anterior descending coronary artery territory - no. (%)                             | 24 (37.5)           |
| Circumflex artery or right coronary artery territory - no. (%)                           | 39 (61)             |
| Combined - no. (%)                                                                       | 1 (1.6)             |
| Total LV surface area - cm <sup>2</sup>                                                  | 230±78              |
| Scar surface area # - cm <sup>2</sup> (% Total LV surface area)                          | 88±60 (39)          |
| Dense scar surface area # - cm <sup>2</sup> (%Total LV surface area)                     | 40±35 (18)          |
| LAVAs region surface area - cm <sup>2</sup> (%Total LV surface area)                     | 24±17 (10)          |
| VT induction and mapping                                                                 |                     |
| VT inducible                                                                             | 53 (82.8)           |
| Clinical VT inducible                                                                    | 23 (35.9)           |
| Non-clinical VT inducible                                                                | 44 (68.8)           |
| Activation / Entrainment mapping - no. (%)                                               | 24 (37.5) / 3 (4.7) |
| Pace mapping - no. (%)                                                                   | 14 (21.9)           |
| Ablation                                                                                 |                     |
| Open-irrigated catheter with contact force monitoring                                    | 58 (90.6)           |
| Thermocool Smarttouch® - no. (%)                                                         | 50 (78.1)           |
| TactiCath Quartz® - no. (%)                                                              | 8 (12.5)            |
| Open-irrigated catheter without contact force monitoring (Intellanav MIFI OI®) - no. (%) | 6 (9.4)             |
| Procedural data                                                                          |                     |
| Total procedure time – min                                                               | 305±65              |
| Total x-ray exposure time – min                                                          | 24±10               |
| Total radiofrequency energy delivery time – min                                          | 55±26               |
| Procedural endpoint                                                                      |                     |
| Assessment of VT inducibility                                                            | 47                  |
| Clinical VT still inducible - no. (%)                                                    | 1 (2.6)             |
| Non-clinical VT still inducible - no. (%)                                                | 18 (28.1)           |
| Non-inducibility of any VT - no. (%)                                                     | 28 (43.8)           |
| Elimination of all late potentials - no. (%)                                             | 60 (93.8)           |
| Long-term clinical outcome                                                               |                     |
| Appropriate ICD shock - no. (%)                                                          | 11 (12.2)           |
| Repeat procedures - no. (%)                                                              | 4 (6.3)             |
| VT storm - no. (%)                                                                       | 1 (1.6)             |
| All-cause mortality - no. (%)                                                            | 15 (23.4)           |
| Cardiovascular                                                                           | 9 (60)              |
| Noncardiovascular                                                                        | 5 (33)              |
| Unknown                                                                                  | 1 (7)               |

\* Plus-minus values are means ± standard deviation.

\*\* Data regarding LV endocardial maps.

# Areas of scar (defined as bipolar voltage &lt;1.5mV) and dense scar (defined as bipolar voltage &lt; 0.5mV). In patients mapped with the Intellamap Orion® basket catheter an adjusted voltage range of 0.2–0.8 mV was used 20.

3D: Three dimensional; ICD: Implantable cardioverter-defibrillator; IQR: Interquartile Range; LAVAs: local abnormal ventricular activities; LV: Left ventricle; MDCT: Multidetector computed tomography; MRI: magnetic resonance; VT: Ventricular tachycardia
